# Supplementary material for: Converting Mn/Al layered double hydroxide anion exchangers into cation exchangers by topotactic reactions using alkali metal sulfate solutions
Source: Royal Society of Chemistry journal article supplement (doi:10.1039/c9cc03491a), 2019-01-01

## Supplementary material

SM1 - EDS spectrum of Mn/Al-NO<sub>3</sub>.

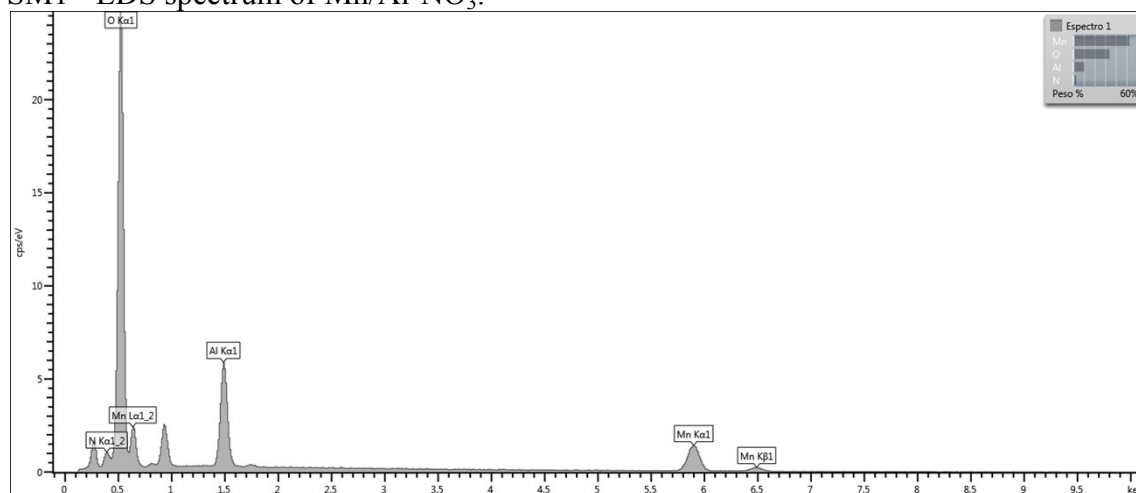

SM2 – EDS spectrum of Mn/Al-NO<sub>3</sub> after exchange with Na<sub>2</sub>SO<sub>4</sub>.

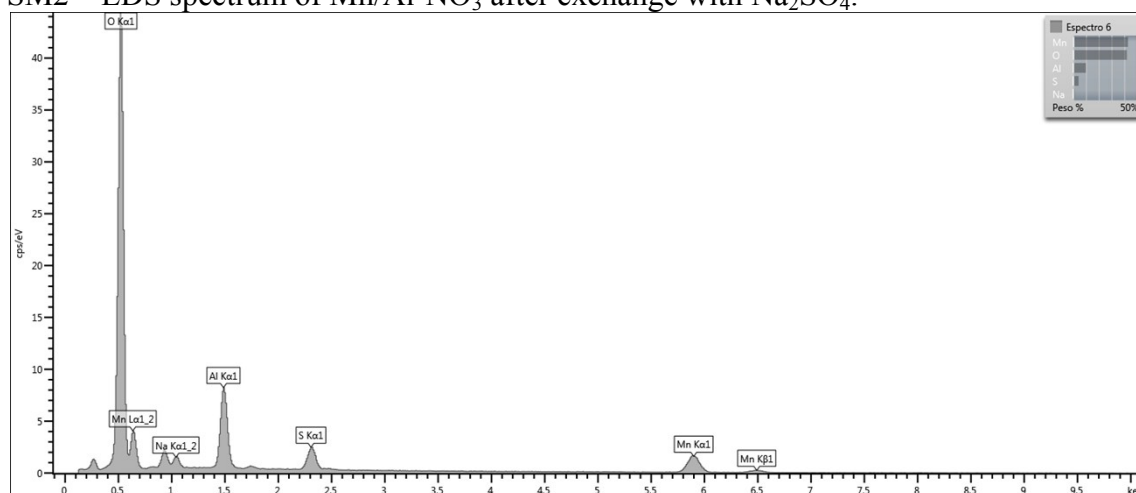

SM3 – EDS spectrum of Mn/Al-Cl.

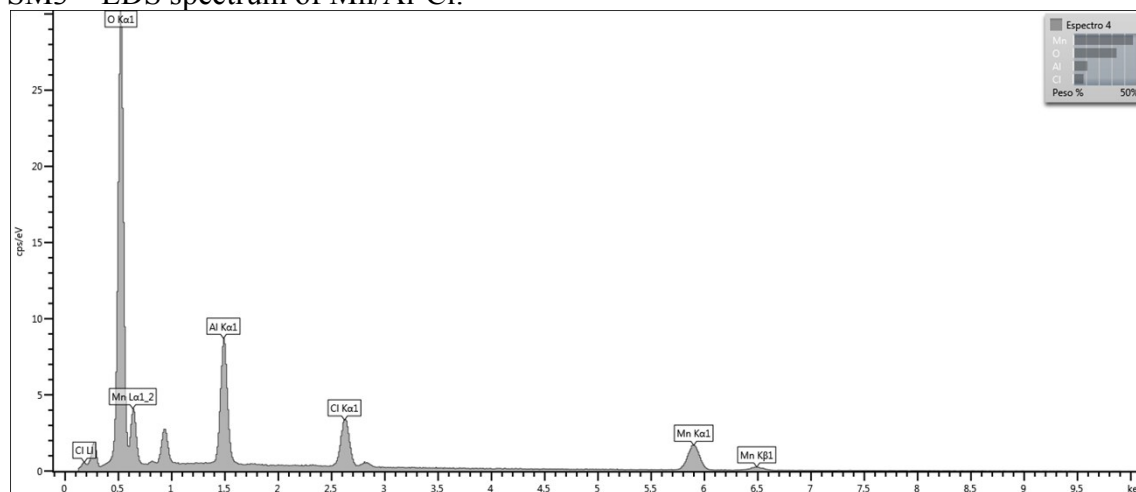

SM4 – EDS spectrum of Mn/Al-Cl after exchange with Na<sub>2</sub>SO<sub>4</sub>.

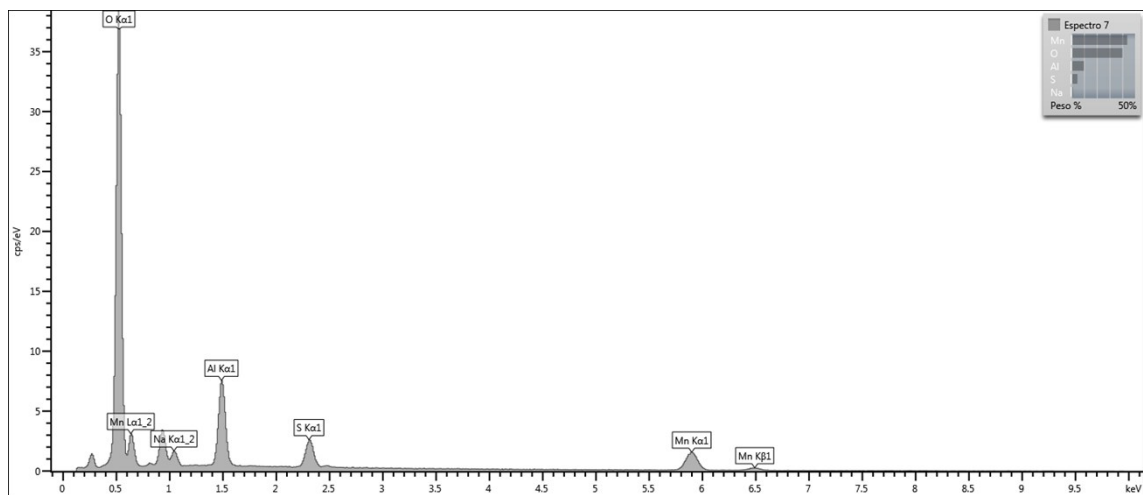

SM5 – EDS spectrum Mn/Al-CO<sub>3</sub>.

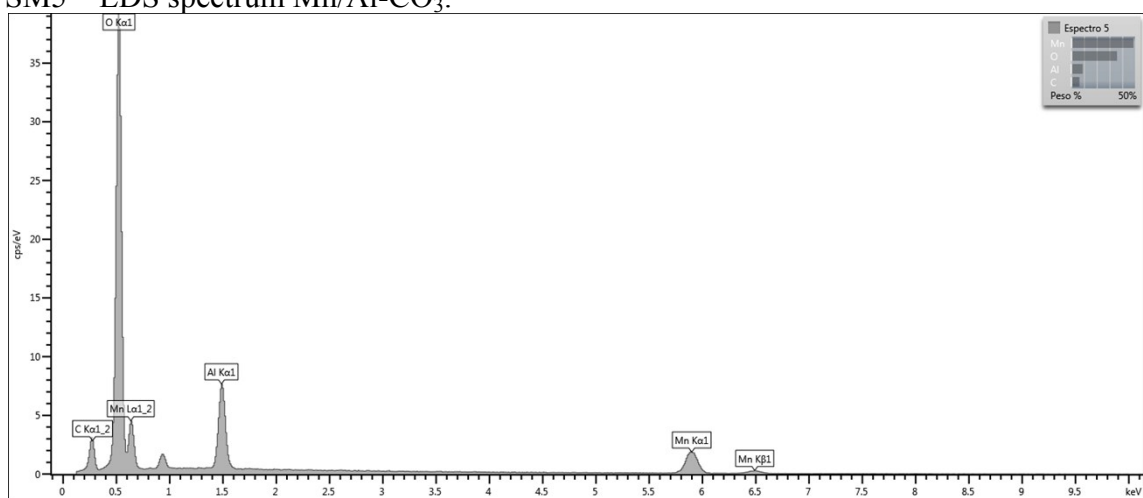

SM6 – EDS spectrum of Mn/Al-CO<sub>3</sub> after exchange with Na<sub>2</sub>SO<sub>4</sub>.

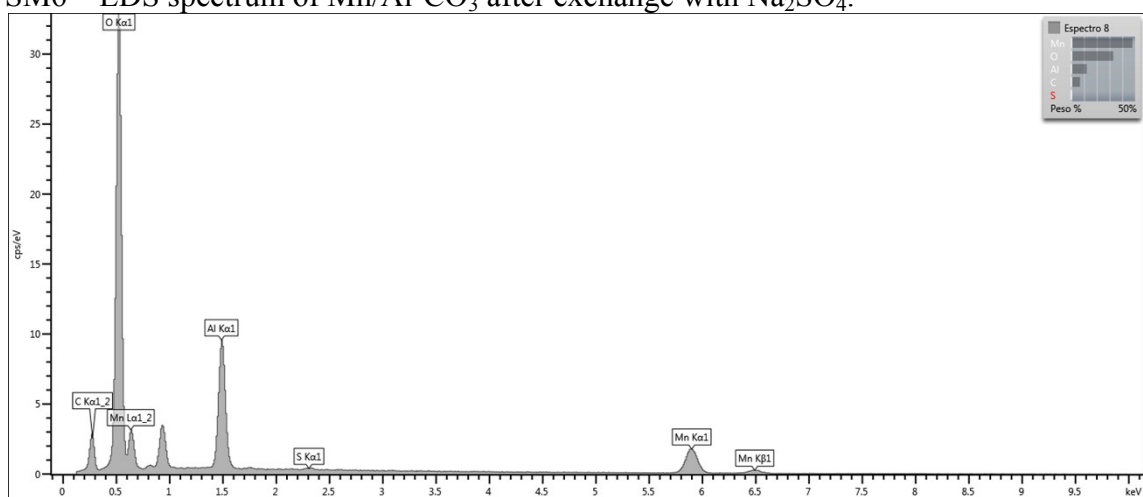

Supplement: c9cc03491a1.pdf [file c9cc03491a1.pdf]
